# Supplementary material for: ROCK Inhibitor (Y-27632) Abolishes the Negative Impacts of miR-155 in the Endometrium-Derived Extracellular Vesicles and Supports Embryo Attachment
Source: Cells. 2022 Oct 10;11(19):3178. doi: 10.3390/cells11193178 (PMC9564368; doi:10.3390/cells11193178)
Supplement: Supplementary file 1 [file cells-11-03178-s001.zip]

Archive with 5 entries (5 files):
- Figure S1. vector.pdf
- Figure S2. genemania-report.pdf
- Table S1. raw data -combined.xlsx
- Table S2. functional annotation.xlsx
- Table S3. Biological processes.xlsx
