# Supplementary material for: ROCK Inhibitor (Y-27632) Abolishes the Negative Impacts of miR-155 in the Endometrium-Derived Extracellular Vesicles and Supports Embryo Attachment
Source: Cells. 2022 Oct 10;11(19):3178. doi: 10.3390/cells11193178 (PMC9564368; doi:10.3390/cells11193178)
Supplement: Supplementary file 1 [file cells-11-03178-s001.zip › Table S2. functional annotation.xlsx]

## Sheet: functional annotation-all the 8
ID	Gene Name	GOTERM_BP_DIRECT	GOTERM_CC_DIRECT	GOTERM_MF_DIRECT	UP_KW_BIOLOGICAL_PROCESS	UP_KW_CELLULAR_COMPONENT	UP_KW_MOLECULAR_FUNCTION
A0A5G2QN76	CD44 molecule(CD44)	GO:0006954~inflammatory response,GO:0007155~cell adhesion,GO:0030214~hyaluronan catabolic process,GO:0033138~positive regulation of peptidyl-serine phosphorylation,GO:0034116~positive regulation of heterotypic cell-cell adhesion,GO:0042110~T cell activation,GO:0043154~negative regulation of cysteine-type endopeptidase activity involved in apoptotic process,GO:0043518~negative regulation of DNA da…	GO:0005794~Golgi apparatus,GO:0005829~cytosol,GO:0005886~plasma membrane,GO:0005902~microvillus,GO:0009986~cell surface,GO:0016021~integral component of membrane,GO:0016323~basolateral plasma membrane,GO:0016324~apical plasma membrane,GO:0031258~lamellipodium membrane,GO:0035692~macrophage migration inhibitory factor receptor complex,	GO:0004888~transmembrane signaling receptor activity,GO:0004896~cytokine receptor activity,GO:0005540~hyaluronic acid binding,	KW-0130~Cell adhesion,	KW-0472~Membrane,KW-0966~Cell projection,KW-1003~Cell membrane,
A0A286ZPI8	CD55 molecule (Cromer blood group)(CD55)	GO:0002456~T cell mediated immunity,GO:0045959~negative regulation of complement activation, classical pathway,	GO:0005886~plasma membrane,GO:0016021~integral component of membrane,GO:0097225~sperm midpiece,			KW-0472~Membrane,
A0A287A2R9	CRK proto-oncogene, adaptor protein(CRK)	GO:0001764~neuron migration,GO:0006629~lipid metabolic process,GO:0008360~regulation of cell shape,GO:0016358~dendrite development,GO:0021766~hippocampus development,GO:0021987~cerebral cortex development,GO:0030010~establishment of cell polarity,GO:0030036~actin cytoskeleton organization,GO:0032956~regulation of actin cytoskeleton organization,GO:0033628~regulation of cell adhesion mediated by i…	GO:0015629~actin cytoskeleton,GO:0016020~membrane,GO:0032991~macromolecular complex,	GO:0001784~phosphotyrosine binding,GO:0017124~SH3 domain binding,GO:0030159~receptor signaling complex scaffold activity,GO:0031625~ubiquitin protein ligase binding,GO:0042169~SH2 domain binding,GO:0043621~protein self-association,GO:0046875~ephrin receptor binding,GO:1990782~protein tyrosine kinase binding,
A0A287AHK1	GC vitamin D binding protein(GC)	GO:0042359~vitamin D metabolic process,	GO:0005615~extracellular space,GO:0005737~cytoplasm,	GO:0003779~actin binding,GO:0005499~vitamin D binding,GO:0090482~vitamin transmembrane transporter activity,GO:1902118~calcidiol binding,	KW-0813~Transport,	KW-0964~Secreted,	KW-0009~Actin-binding,
F1RZ89	N-sulfoglucosamine sulfohydrolase(SGSH)	GO:0006027~glycosaminoglycan catabolic process,GO:0030200~heparan sulfate proteoglycan catabolic process,	GO:0005764~lysosome,	GO:0005539~glycosaminoglycan binding,GO:0008449~N-acetylglucosamine-6-sulfatase activity,GO:0008484~sulfuric ester hydrolase activity,GO:0016250~N-sulfoglucosamine sulfohydrolase activity,			KW-0378~Hydrolase,
A0A5G2QIK1	Parkinsonism associated deglycase(PARK7)	GO:0006281~DNA repair,GO:0006469~negative regulation of protein kinase activity,GO:0006517~protein deglycosylation,GO:0006914~autophagy,GO:0007338~single fertilization,GO:0010273~detoxification of copper ion,GO:0010629~negative regulation of gene expression,GO:0016570~histone modification,GO:0031334~positive regulation of protein complex assembly,GO:0032091~negative regulation of protein binding,…	GO:0000785~chromatin,GO:0005634~nucleus,GO:0005739~mitochondrion,GO:0005783~endoplasmic reticulum,GO:0005829~cytosol,GO:0005886~plasma membrane,GO:0016605~PML body,GO:0045121~membrane raft,GO:0048471~perinuclear region of cytoplasm,	GO:0003713~transcription coactivator activity,GO:0003729~mRNA binding,GO:0005102~receptor binding,GO:0008233~peptidase activity,GO:0016532~superoxide dismutase copper chaperone activity,GO:0016684~oxidoreductase activity, acting on peroxide as acceptor,GO:0019900~kinase binding,GO:0019955~cytokine binding,GO:0036470~tyrosine 3-monooxygenase activator activity,GO:0036478~L-dopa decarboxylase activ…	KW-0072~Autophagy,KW-0278~Fertilization,KW-0346~Stress response,
K7GQ95	S100 calcium binding protein A2(S100A2)	GO:0043542~endothelial cell migration,		GO:0005509~calcium ion binding,GO:0046914~transition metal ion binding,GO:0048306~calcium-dependent protein binding,
Q2EN75	S100 calcium binding protein A6(S100A6)	GO:0098586~cellular response to virus,	GO:0001726~ruffle,GO:0005634~nucleus,GO:0005635~nuclear envelope,GO:0005737~cytoplasm,GO:0005829~cytosol,GO:0031234~extrinsic component of cytoplasmic side of plasma membrane,GO:0048471~perinuclear region of cytoplasm,	GO:0005509~calcium ion binding,GO:0005523~tropomyosin binding,GO:0008270~zinc ion binding,GO:0042803~protein homodimerization activity,GO:0044548~S100 protein binding,GO:0048306~calcium-dependent protein binding,		KW-0472~Membrane,KW-0539~Nucleus,KW-0963~Cytoplasm,KW-1003~Cell membrane,
A0A287ANZ8	Thy-1 cell surface antigen(THY1)	GO:0001525~angiogenesis,GO:0002693~positive regulation of cellular extravasation,GO:0006469~negative regulation of protein kinase activity,GO:0007010~cytoskeleton organization,GO:0007155~cell adhesion,GO:0007229~integrin-mediated signaling pathway,GO:0030334~regulation of cell migration,GO:0030336~negative regulation of cell migration,GO:0034116~positive regulation of heterotypic cell-cell adhesi…	GO:0005783~endoplasmic reticulum,GO:0005886~plasma membrane,GO:0009986~cell surface,GO:0016324~apical plasma membrane,GO:0030425~dendrite,GO:0031225~anchored component of membrane,GO:0031362~anchored component of external side of plasma membrane,GO:0045121~membrane raft,	GO:0005096~GTPase activator activity,GO:0005178~integrin binding,GO:0019901~protein kinase binding,GO:0034235~GPI anchor binding,		KW-0472~Membrane,
A0A286ZWJ1	actin gamma 2, smooth muscle(ACTG2)	GO:0014829~vascular smooth muscle contraction,	GO:0005737~cytoplasm,GO:0005869~dynactin complex,GO:0071944~cell periphery,
A0A287A363	afamin(AFM)	GO:0050821~protein stabilization,GO:0051180~vitamin transport,GO:0071693~protein transport within extracellular region,	GO:0005615~extracellular space,GO:0005737~cytoplasm,	GO:0005504~fatty acid binding,GO:0008270~zinc ion binding,GO:0008431~vitamin E binding,GO:0046872~metal ion binding,		KW-0964~Secreted,
A0A286ZT13	albumin(ALB)	GO:0009267~cellular response to starvation,GO:0043066~negative regulation of apoptotic process,GO:0051659~maintenance of mitochondrion location,	GO:0005615~extracellular space,GO:0005737~cytoplasm,GO:0005783~endoplasmic reticulum,GO:0005794~Golgi apparatus,GO:0032991~macromolecular complex,GO:0070062~extracellular exosome,	GO:0003677~DNA binding,GO:0005504~fatty acid binding,GO:0008270~zinc ion binding,GO:0015643~toxic substance binding,GO:0019825~oxygen binding,GO:0030170~pyridoxal phosphate binding,GO:0036094~small molecule binding,GO:0042802~identical protein binding,GO:0046872~metal ion binding,GO:0051087~chaperone binding,GO:1903981~enterobactin binding,		KW-0964~Secreted,
A0A5G2QUE9	alpha fetoprotein(AFP)	GO:0001542~ovulation from ovarian follicle,GO:0042448~progesterone metabolic process,GO:0060395~SMAD protein signal transduction,	GO:0005615~extracellular space,GO:0005737~cytoplasm,	GO:0005504~fatty acid binding,GO:0008270~zinc ion binding,		KW-0964~Secreted,
A0A5G2Q8I9	alpha-2-macroglobulin(A2M)	GO:0001869~negative regulation of complement activation, lectin pathway,	GO:0005615~extracellular space,	GO:0002020~protease binding,GO:0004866~endopeptidase inhibitor activity,GO:0004867~serine-type endopeptidase inhibitor activity,GO:0005102~receptor binding,GO:0019959~interleukin-8 binding,GO:0019966~interleukin-1 binding,GO:0043120~tumor necrosis factor binding,GO:0048306~calcium-dependent protein binding,		KW-0964~Secreted,	KW-0646~Protease inhibitor,KW-0722~Serine protease inhibitor,
A0A286ZJV6	annexin A2(ANXA2)	GO:0001525~angiogenesis,GO:0001765~membrane raft assembly,GO:0001921~positive regulation of receptor recycling,GO:0006900~membrane budding,GO:0030199~collagen fibril organization,GO:0031340~positive regulation of vesicle fusion,GO:0032804~negative regulation of low-density lipoprotein particle receptor catabolic process,GO:0036035~osteoclast development,GO:0042730~fibrinolysis,GO:0043086~negative…	GO:0005576~extracellular region,GO:0005604~basement membrane,GO:0005615~extracellular space,GO:0005634~nucleus,GO:0005737~cytoplasm,GO:0005765~lysosomal membrane,GO:0005768~endosome,GO:0005769~early endosome,GO:0005811~lipid particle,GO:0005829~cytosol,GO:0005886~plasma membrane,GO:0009986~cell surface,GO:0016020~membrane,GO:0016323~basolateral plasma membrane,GO:0019897~extrinsic component of pl…	GO:0001786~phosphatidylserine binding,GO:0002020~protease binding,GO:0004859~phospholipase inhibitor activity,GO:0004867~serine-type endopeptidase inhibitor activity,GO:0005262~calcium channel activity,GO:0005509~calcium ion binding,GO:0005515~protein binding,GO:0005544~calcium-dependent phospholipid binding,GO:0005546~phosphatidylinositol-4,5-bisphosphate binding,GO:0008092~cytoskeletal protein …		KW-0084~Basement membrane,KW-0272~Extracellular matrix,KW-0964~Secreted,
K7GM40	apolipoprotein A1(APOA1)	GO:0001932~regulation of protein phosphorylation,GO:0001935~endothelial cell proliferation,GO:0002719~negative regulation of cytokine production involved in immune response,GO:0006656~phosphatidylcholine biosynthetic process,GO:0006695~cholesterol biosynthetic process,GO:0006869~lipid transport,GO:0007186~G-protein coupled receptor signaling pathway,GO:0007229~integrin-mediated signaling pathway,…	GO:0005615~extracellular space,GO:0030139~endocytic vesicle,GO:0034361~very-low-density lipoprotein particle,GO:0034364~high-density lipoprotein particle,GO:0034366~spherical high-density lipoprotein particle,GO:0042627~chylomicron,	GO:0001540~beta-amyloid binding,GO:0005543~phospholipid binding,GO:0008035~high-density lipoprotein particle binding,GO:0008289~lipid binding,GO:0015485~cholesterol binding,GO:0019899~enzyme binding,GO:0031072~heat shock protein binding,GO:0031210~phosphatidylcholine binding,GO:0034191~apolipoprotein A-I receptor binding,GO:0042802~identical protein binding,GO:0042803~protein homodimerization act…	KW-0153~Cholesterol metabolism,KW-0443~Lipid metabolism,KW-0445~Lipid transport,KW-0753~Steroid metabolism,KW-0813~Transport,KW-1207~Sterol metabolism,	KW-0345~HDL,KW-0964~Secreted,
A0A140TAK8	apolipoprotein H(APOH)	GO:0001937~negative regulation of endothelial cell proliferation,GO:0006641~triglyceride metabolic process,GO:0007597~blood coagulation, intrinsic pathway,GO:0010596~negative regulation of endothelial cell migration,GO:0016525~negative regulation of angiogenesis,GO:0030195~negative regulation of blood coagulation,GO:0031639~plasminogen activation,GO:0033033~negative regulation of myeloid cell apo…	GO:0005576~extracellular region,GO:0009986~cell surface,GO:0034361~very-low-density lipoprotein particle,GO:0034364~high-density lipoprotein particle,GO:0042627~chylomicron,	GO:0005543~phospholipid binding,GO:0008201~heparin binding,GO:0042802~identical protein binding,GO:0060230~lipoprotein lipase activator activity,			KW-0358~Heparin-binding,
A0A287B7B9	beta-2-microglobulin(B2M)	GO:0002474~antigen processing and presentation of peptide antigen via MHC class I,GO:0002726~positive regulation of T cell cytokine production,GO:0006955~immune response,GO:0007611~learning or memory,GO:0019885~antigen processing and presentation of endogenous peptide antigen via MHC class I,GO:0034756~regulation of iron ion transport,GO:0048260~positive regulation of receptor-mediated endocytosi…	GO:0005576~extracellular region,GO:0005794~Golgi apparatus,GO:0005829~cytosol,GO:0042612~MHC class I protein complex,GO:0042824~MHC class I peptide loading complex,GO:1990712~HFE-transferrin receptor complex,	GO:0042803~protein homodimerization activity,	KW-0391~Immunity,	KW-0490~MHC I,KW-0964~Secreted,
A0A287B7B9	beta-2-microglobulin(B2M)	GO:0002474~antigen processing and presentation of peptide antigen via MHC class I,GO:0002726~positive regulation of T cell cytokine production,GO:0006955~immune response,GO:0007611~learning or memory,GO:0019885~antigen processing and presentation of endogenous peptide antigen via MHC class I,GO:0034756~regulation of iron ion transport,GO:0048260~positive regulation of receptor-mediated endocytosi…	GO:0005576~extracellular region,GO:0005794~Golgi apparatus,GO:0005829~cytosol,GO:0042612~MHC class I protein complex,GO:0042824~MHC class I peptide loading complex,GO:1990712~HFE-transferrin receptor complex,	GO:0042803~protein homodimerization activity,	KW-0391~Immunity,	KW-0490~MHC I,KW-0964~Secreted,
A0A287BPL8	cadherin 1(CDH1)	GO:0007156~homophilic cell adhesion via plasma membrane adhesion molecules,GO:0007416~synapse assembly,GO:0022408~negative regulation of cell-cell adhesion,GO:0030336~negative regulation of cell migration,GO:0034332~adherens junction organization,GO:0042307~positive regulation of protein import into nucleus,GO:0045893~positive regulation of transcription, DNA-templated,GO:0071285~cellular respons…	GO:0005737~cytoplasm,GO:0005794~Golgi apparatus,GO:0005802~trans-Golgi network,GO:0005886~plasma membrane,GO:0005912~adherens junction,GO:0009898~cytoplasmic side of plasma membrane,GO:0016021~integral component of membrane,GO:0016328~lateral plasma membrane,GO:0016342~catenin complex,GO:0016600~flotillin complex,GO:0030027~lamellipodium,GO:0030864~cortical actin cytoskeleton,GO:0043296~apical ju…	GO:0005509~calcium ion binding,GO:0008013~beta-catenin binding,GO:0030506~ankyrin binding,GO:0032794~GTPase activating protein binding,GO:0042802~identical protein binding,GO:0045295~gamma-catenin binding,GO:0045296~cadherin binding,	KW-0130~Cell adhesion,	KW-0472~Membrane,KW-1003~Cell membrane,
A0A287AHS0	calmodulin 3(CALM3)	GO:0000086~G2/M transition of mitotic cell cycle,GO:0002027~regulation of heart rate,GO:0005513~detection of calcium ion,GO:0010880~regulation of release of sequestered calcium ion into cytosol by sarcoplasmic reticulum,GO:0019722~calcium-mediated signaling,GO:0032465~regulation of cytokinesis,GO:0032516~positive regulation of phosphoprotein phosphatase activity,GO:0043388~positive regulation of …	GO:0000922~spindle pole,GO:0005813~centrosome,GO:0005876~spindle microtubule,GO:0008076~voltage-gated potassium channel complex,GO:0030017~sarcomere,GO:0031982~vesicle,GO:0034704~calcium channel complex,GO:0043209~myelin sheath,GO:1902494~catalytic complex,	GO:0005509~calcium ion binding,GO:0008179~adenylate cyclase binding,GO:0010856~adenylate cyclase activator activity,GO:0019901~protein kinase binding,GO:0031432~titin binding,GO:0031997~N-terminal myristoylation domain binding,GO:0044325~ion channel binding,GO:0048306~calcium-dependent protein binding,GO:0072542~protein phosphatase activator activity,GO:0097718~disordered domain specific binding,
A0A286ZNA7	calpastatin(CAST)	GO:0010466~negative regulation of peptidase activity,GO:0030163~protein catabolic process,GO:0097340~inhibition of cysteine-type endopeptidase activity,	GO:0005737~cytoplasm,GO:0016020~membrane,	GO:0010859~calcium-dependent cysteine-type endopeptidase inhibitor activity,			KW-0646~Protease inhibitor,KW-0789~Thiol protease inhibitor,
A0A287BF94	cathepsin B(CTSB)	GO:0006590~thyroid hormone generation,GO:0030574~collagen catabolic process,GO:0030855~epithelial cell differentiation,GO:0046697~decidualization,GO:0046718~viral entry into host cell,GO:0050790~regulation of catalytic activity,GO:0051603~proteolysis involved in cellular protein catabolic process,GO:0097067~cellular response to thyroid hormone stimulus,	GO:0005615~extracellular space,GO:0005764~lysosome,GO:0009897~external side of plasma membrane,GO:0016324~apical plasma membrane,GO:0042470~melanosome,GO:0048471~perinuclear region of cytoplasm,	GO:0004175~endopeptidase activity,GO:0004197~cysteine-type endopeptidase activity,GO:0005518~collagen binding,GO:0043394~proteoglycan binding,		KW-0458~Lysosome,KW-0472~Membrane,KW-0964~Secreted,KW-1003~Cell membrane,	KW-0378~Hydrolase,KW-0645~Protease,KW-0788~Thiol protease,
Q28944	cathepsin V(CTSV)	GO:0006955~immune response,GO:0016540~protein autoprocessing,GO:0030574~collagen catabolic process,GO:0031638~zymogen activation,GO:0034230~enkephalin processing,GO:0043373~CD4-positive, alpha-beta T cell lineage commitment,GO:0048002~antigen processing and presentation of peptide antigen,GO:0051603~proteolysis involved in cellular protein catabolic process,GO:0060309~elastin catabolic process,	GO:0005615~extracellular space,GO:0005764~lysosome,GO:0016324~apical plasma membrane,GO:0042583~chromaffin granule,	GO:0004175~endopeptidase activity,GO:0004197~cysteine-type endopeptidase activity,		KW-0458~Lysosome,KW-0472~Membrane,KW-0964~Secreted,KW-0968~Cytoplasmic vesicle,KW-1003~Cell membrane,	KW-0378~Hydrolase,KW-0645~Protease,KW-0788~Thiol protease,
A0A5G2QJA9	complement C3(C3)	GO:0001798~positive regulation of type IIa hypersensitivity,GO:0001934~positive regulation of protein phosphorylation,GO:0001970~positive regulation of activation of membrane attack complex,GO:0006631~fatty acid metabolic process,GO:0006954~inflammatory response,GO:0006956~complement activation,GO:0006957~complement activation, alternative pathway,GO:0006958~complement activation, classical pathw…	GO:0005615~extracellular space,GO:0009986~cell surface,GO:0032991~macromolecular complex,	GO:0004866~endopeptidase inhibitor activity,GO:0005515~protein binding,GO:0031715~C5L2 anaphylatoxin chemotactic receptor binding,	KW-0179~Complement alternate pathway,KW-0180~Complement pathway,KW-0276~Fatty acid metabolism,KW-0391~Immunity,KW-0395~Inflammatory response,KW-0399~Innate immunity,KW-0443~Lipid metabolism,	KW-0964~Secreted,
P62895	cytochrome c, somatic(CYCS)	GO:0006122~mitochondrial electron transport, ubiquinol to cytochrome c,GO:0006123~mitochondrial electron transport, cytochrome c to oxygen,GO:0006915~apoptotic process,GO:0043280~positive regulation of cysteine-type endopeptidase activity involved in apoptotic process,	GO:0005758~mitochondrial intermembrane space,GO:0070469~respiratory chain,	GO:0009055~electron carrier activity,GO:0020037~heme binding,GO:0046872~metal ion binding,	KW-0053~Apoptosis,KW-0249~Electron transport,KW-0679~Respiratory chain,KW-0813~Transport,	KW-0496~Mitochondrion,
I3LA65	desmoglein 1(DSG1)	GO:0007156~homophilic cell adhesion via plasma membrane adhesion molecules,GO:0098609~cell-cell adhesion,	GO:0005886~plasma membrane,GO:0005911~cell-cell junction,GO:0016021~integral component of membrane,GO:0030057~desmosome,	GO:0005509~calcium ion binding,GO:0045295~gamma-catenin binding,	KW-0130~Cell adhesion,	KW-0472~Membrane,KW-0965~Cell junction,KW-1003~Cell membrane,
F1RW75	desmoplakin(DSP)	GO:0002934~desmosome organization,GO:0003223~ventricular compact myocardium morphogenesis,GO:0018149~peptide cross-linking,GO:0030216~keratinocyte differentiation,GO:0034332~adherens junction organization,GO:0042060~wound healing,GO:0043588~skin development,GO:0045104~intermediate filament cytoskeleton organization,GO:0045109~intermediate filament organization,GO:0086073~bundle of His cell-Purkin…	GO:0001533~cornified envelope,GO:0005654~nucleoplasm,GO:0005689~U12-type spliceosomal complex,GO:0005737~cytoplasm,GO:0005829~cytosol,GO:0005856~cytoskeleton,GO:0005882~intermediate filament,GO:0005886~plasma membrane,GO:0014704~intercalated disc,GO:0016020~membrane,GO:0016323~basolateral plasma membrane,GO:0030054~cell junction,GO:0030057~desmosome,	GO:0005080~protein kinase C binding,GO:0005198~structural molecule activity,GO:0046872~metal ion binding,GO:0050839~cell adhesion molecule binding,GO:0097110~scaffold protein binding,		KW-0206~Cytoskeleton,KW-0963~Cytoplasm,
A0A5S6I0G9	diazepam binding inhibitor, acyl-CoA binding protein(DBI)	GO:0036151~phosphatidylcholine acyl-chain remodeling,GO:0042742~defense response to bacterium,GO:1903060~negative regulation of protein lipidation,GO:1905920~positive regulation of CoA-transferase activity,GO:2001140~positive regulation of phospholipid transport,	GO:0005783~endoplasmic reticulum,GO:0005794~Golgi apparatus,GO:0032994~protein-lipid complex,	GO:0000062~fatty-acyl-CoA binding,GO:0008289~lipid binding,GO:0036042~long-chain fatty acyl-CoA binding,GO:0042802~identical protein binding,	KW-0813~Transport,	KW-0256~Endoplasmic reticulum,KW-0333~Golgi apparatus,	KW-0044~Antibiotic,KW-0929~Antimicrobial,
A0A286ZIH3	elongation factor 1-alpha, somatic form-like(LOC100620900)	GO:0006412~translation,GO:0006414~translational elongation,		GO:0003746~translation elongation factor activity,GO:0003924~GTPase activity,GO:0005525~GTP binding,	KW-0648~Protein biosynthesis,		KW-0251~Elongation factor,
A0A287A8S8	enolase 1(ENO1)	GO:0006096~glycolytic process,GO:0009615~response to virus,GO:0010756~positive regulation of plasminogen activation,GO:0030308~negative regulation of cell growth,GO:0032889~regulation of vacuole fusion, non-autophagic,GO:0045933~positive regulation of muscle contraction,GO:0061621~canonical glycolysis,GO:1903298~negative regulation of hypoxia-induced intrinsic apoptotic signaling pathway,GO:20011…	GO:0000015~phosphopyruvate hydratase complex,GO:0005886~plasma membrane,GO:0009986~cell surface,GO:0099738~cell cortex region,	GO:0000287~magnesium ion binding,GO:0000977~RNA polymerase II regulatory region sequence-specific DNA binding,GO:0001227~transcriptional repressor activity, RNA polymerase II transcription regulatory region sequence-specific binding,GO:0004634~phosphopyruvate hydratase activity,GO:0042803~protein homodimerization activity,GO:0051020~GTPase binding,	KW-0324~Glycolysis,		KW-0456~Lyase,
A0A287AL10	ferritin heavy chain 1(FTH1)	GO:0006826~iron ion transport,GO:0006879~cellular iron ion homeostasis,GO:0006880~intracellular sequestering of iron ion,	GO:0005737~cytoplasm,	GO:0004322~ferroxidase activity,GO:0008198~ferrous iron binding,GO:0008199~ferric iron binding,	KW-0409~Iron storage,KW-0945~Host-virus interaction,	KW-0963~Cytoplasm,	KW-0560~Oxidoreductase,
F1RIP3	ferritin light chain(FTL)	GO:0006826~iron ion transport,GO:0006879~cellular iron ion homeostasis,	GO:0008043~intracellular ferritin complex,	GO:0005506~iron ion binding,GO:0008199~ferric iron binding,	KW-0409~Iron storage,
F1S6M1	galactosamine (N-acetyl)-6-sulfatase(GALNS)		GO:0005764~lysosome,	GO:0004065~arylsulfatase activity,GO:0008484~sulfuric ester hydrolase activity,GO:0043890~N-acetylgalactosamine-6-sulfatase activity,GO:0046872~metal ion binding,		KW-0458~Lysosome,	KW-0378~Hydrolase,
A0A286ZUW1	glucosamine (N-acetyl)-6-sulfatase(GNS)	GO:0030203~glycosaminoglycan metabolic process,	GO:0005764~lysosome,	GO:0005539~glycosaminoglycan binding,GO:0008449~N-acetylglucosamine-6-sulfatase activity,GO:0046872~metal ion binding,		KW-0458~Lysosome,	KW-0378~Hydrolase,
A0A2C9F3C0	glucuronidase beta(GUSB)	GO:0019391~glucuronoside catabolic process,	GO:0005615~extracellular space,GO:0005764~lysosome,	GO:0004566~beta-glucuronidase activity,GO:0005102~receptor binding,GO:0019904~protein domain specific binding,GO:0030246~carbohydrate binding,		KW-0458~Lysosome,	KW-0326~Glycosidase,KW-0378~Hydrolase,
A0A5G2QCB4	glutathione-disulfide reductase(GSR)	GO:0006749~glutathione metabolic process,GO:0034599~cellular response to oxidative stress,GO:0045454~cell redox homeostasis,	GO:0005737~cytoplasm,GO:0005739~mitochondrion,GO:0005829~cytosol,GO:0009897~external side of plasma membrane,	GO:0004362~glutathione-disulfide reductase activity,GO:0050660~flavin adenine dinucleotide binding,GO:0050661~NADP binding,		KW-0963~Cytoplasm,
A0A286ZWK2	heat shock protein family A (Hsp70) member 8(HSPA8)	GO:0016192~vesicle-mediated transport,GO:0031647~regulation of protein stability,GO:0034620~cellular response to unfolded protein,GO:0042026~protein refolding,GO:0044829~positive regulation by host of viral genome replication,GO:0045892~negative regulation of transcription, DNA-templated,GO:0046034~ATP metabolic process,GO:0048026~positive regulation of mRNA splicing, via spliceosome,GO:0051085~c…	GO:0000974~Prp19 complex,GO:0005634~nucleus,GO:0005737~cytoplasm,GO:0005764~lysosome,GO:0005770~late endosome,GO:0005776~autophagosome,GO:0005829~cytosol,GO:0005886~plasma membrane,GO:0030425~dendrite,GO:0043195~terminal bouton,GO:0048471~perinuclear region of cytoplasm,GO:0070062~extracellular exosome,GO:0098684~photoreceptor ribbon synapse,GO:0098793~presynapse,GO:0098978~glutamatergic synapse,…	GO:0001664~G-protein coupled receptor binding,GO:0001786~phosphatidylserine binding,GO:0005524~ATP binding,GO:0030674~protein binding, bridging,GO:0031072~heat shock protein binding,GO:0031625~ubiquitin protein ligase binding,GO:0044183~protein binding involved in protein folding,GO:0051082~unfolded protein binding,GO:0051087~chaperone binding,GO:0051787~misfolded protein binding,GO:0055131~C3HC4…	KW-0346~Stress response,
A0A5G2QRW3	hemoglobin, beta(HBB)	GO:0015671~oxygen transport,GO:0042744~hydrogen peroxide catabolic process,GO:0098869~cellular oxidant detoxification,	GO:0005833~hemoglobin complex,GO:0031838~haptoglobin-hemoglobin complex,	GO:0005344~oxygen transporter activity,GO:0005515~protein binding,GO:0019825~oxygen binding,GO:0020037~heme binding,GO:0031721~hemoglobin alpha binding,GO:0043177~organic acid binding,GO:0046872~metal ion binding,	KW-0561~Oxygen transport,KW-0813~Transport,
A0A2C9F3E9	junction plakoglobin(JUP)	GO:0001954~positive regulation of cell-matrix adhesion,GO:0002159~desmosome assembly,GO:0007155~cell adhesion,GO:0016477~cell migration,GO:0042127~regulation of cell proliferation,GO:0042307~positive regulation of protein import into nucleus,GO:0043537~negative regulation of blood vessel endothelial cell migration,GO:0043588~skin development,GO:0045766~positive regulation of angiogenesis,GO:00459…	GO:0005737~cytoplasm,GO:0005829~cytosol,GO:0005856~cytoskeleton,GO:0005882~intermediate filament,GO:0005912~adherens junction,GO:0014704~intercalated disc,GO:0016342~catenin complex,GO:0030018~Z disc,GO:0030057~desmosome,GO:0032993~protein-DNA complex,GO:0071665~gamma-catenin-TCF7L2 complex,	GO:0003713~transcription coactivator activity,GO:0005198~structural molecule activity,GO:0016922~ligand-dependent nuclear receptor binding,GO:0019903~protein phosphatase binding,GO:0045294~alpha-catenin binding,GO:0045296~cadherin binding,	KW-0130~Cell adhesion,	KW-0206~Cytoskeleton,KW-0472~Membrane,KW-0963~Cytoplasm,KW-0965~Cell junction,
F1SGG3	keratin 1(KRT1)	GO:0001867~complement activation, lectin pathway,GO:0018149~peptide cross-linking,GO:0050728~negative regulation of inflammatory response,GO:0051290~protein heterotetramerization,GO:0061436~establishment of skin barrier,	GO:0001533~cornified envelope,GO:0005886~plasma membrane,GO:0045095~keratin filament,	GO:0030246~carbohydrate binding,GO:0030280~structural constituent of epidermis,GO:0046982~protein heterodimerization activity,		KW-0416~Keratin,KW-0472~Membrane,KW-1003~Cell membrane,
I3LDS3	keratin 10(KRT10)	GO:0018149~peptide cross-linking,GO:0030216~keratinocyte differentiation,GO:0051290~protein heterotetramerization,	GO:0001533~cornified envelope,GO:0005737~cytoplasm,GO:0005882~intermediate filament,	GO:0030280~structural constituent of epidermis,GO:0046982~protein heterodimerization activity,
A0A287BHY5	keratin 2(KRT2)	GO:0003334~keratinocyte development,GO:0018149~peptide cross-linking,GO:0031424~keratinization,GO:0032980~keratinocyte activation,GO:0043616~keratinocyte proliferation,GO:0045109~intermediate filament organization,GO:0045684~positive regulation of epidermis development,GO:0051546~keratinocyte migration,	GO:0001533~cornified envelope,GO:0045095~keratin filament,	GO:0008092~cytoskeletal protein binding,GO:0030280~structural constituent of epidermis,		KW-0416~Keratin,
A0A5G2QSE8	keratin 3(KRT3)	GO:0045104~intermediate filament cytoskeleton organization,	GO:0045095~keratin filament,			KW-0416~Keratin,
A0A287BA49, F1SGG6	keratin 5(KRT5)		GO:0005737~cytoplasm,GO:0005886~plasma membrane,GO:0045095~keratin filament,	GO:0097110~scaffold protein binding,		KW-0416~Keratin,
A0A287AG48	keratin 7(KRT7)		GO:0005737~cytoplasm,GO:0045095~keratin filament,			KW-0416~Keratin,
A0A287AWU6	keratin 73(KRT73)		GO:0045095~keratin filament,			KW-0416~Keratin,
A0A287ATD0	keratin 75(KRT75)	GO:0002244~hematopoietic progenitor cell differentiation,	GO:0045095~keratin filament,			KW-0416~Keratin,
A0A287AEL2	keratin, type I cytoskeletal 17(LOC100737113)	GO:0007568~aging,GO:0030855~epithelial cell differentiation,GO:0042633~hair cycle,GO:0045110~intermediate filament bundle assembly,	GO:0005634~nucleus,GO:0005737~cytoplasm,GO:0005882~intermediate filament,GO:0045095~keratin filament,GO:0045178~basal part of cell,GO:0071944~cell periphery,	GO:0005198~structural molecule activity,GO:1990254~keratin filament binding,		KW-0403~Intermediate filament,
A0A5G2QA84	leucine aminopeptidase 3(LAP3)	GO:0006508~proteolysis,	GO:0005654~nucleoplasm,GO:0005737~cytoplasm,GO:0005829~cytosol,GO:0030496~midbody,	GO:0004180~carboxypeptidase activity,GO:0030145~manganese ion binding,GO:0070006~metalloaminopeptidase activity,		KW-0963~Cytoplasm,	KW-0031~Aminopeptidase,KW-0378~Hydrolase,KW-0645~Protease,
A0A5G2R3I8	lysosomal associated membrane protein 1(LAMP1)	GO:0043323~positive regulation of natural killer cell degranulation,GO:0050821~protein stabilization,GO:0072594~establishment of protein localization to organelle,GO:0090160~Golgi to lysosome transport,GO:1902513~regulation of organelle transport along microtubule,	GO:0000421~autophagosome membrane,GO:0005765~lysosomal membrane,GO:0005771~multivesicular body,GO:0005829~cytosol,GO:0005886~plasma membrane,GO:0008021~synaptic vesicle,GO:0009897~external side of plasma membrane,GO:0016021~integral component of membrane,GO:0031902~late endosome membrane,GO:0042383~sarcolemma,GO:0042470~melanosome,GO:0044754~autolysosome,GO:0048471~perinuclear region of cytoplasm…	GO:0019899~enzyme binding,GO:0019904~protein domain specific binding,		KW-0458~Lysosome,KW-0967~Endosome,
F1SUQ9	peptidyl arginine deiminase 6(PADI6)	GO:0007010~cytoskeleton organization,GO:0007028~cytoplasm organization,GO:0036414~histone citrullination,GO:0040016~embryonic cleavage,GO:0043143~regulation of translation by machinery localization,	GO:0005634~nucleus,GO:0005737~cytoplasm,GO:0045111~intermediate filament cytoskeleton,GO:0060473~cortical granule,	GO:0004668~protein-arginine deiminase activity,GO:0005509~calcium ion binding,		KW-0963~Cytoplasm,	KW-0378~Hydrolase,
A0A287A690	peroxiredoxin 2(PRDX2)	GO:0002357~defense response to tumor cell,GO:0002536~respiratory burst involved in inflammatory response,GO:0010310~regulation of hydrogen peroxide metabolic process,GO:0019430~removal of superoxide radicals,GO:0030194~positive regulation of blood coagulation,GO:0031665~negative regulation of lipopolysaccharide-mediated signaling pathway,GO:0032088~negative regulation of NF-kappaB transcription f…	GO:0005829~cytosol,	GO:0004601~peroxidase activity,GO:0008379~thioredoxin peroxidase activity,GO:0016209~antioxidant activity,GO:0016491~oxidoreductase activity,GO:0051920~peroxiredoxin activity,		KW-0963~Cytoplasm,	KW-0049~Antioxidant,KW-0560~Oxidoreductase,KW-0575~Peroxidase,
I3LGN8	plakophilin 1(PKP1)	GO:0007043~cell-cell junction assembly,GO:0045110~intermediate filament bundle assembly,GO:0098609~cell-cell adhesion,GO:1902373~negative regulation of mRNA catabolic process,	GO:0005634~nucleus,GO:0005654~nucleoplasm,GO:0005737~cytoplasm,GO:0005886~plasma membrane,GO:0005912~adherens junction,GO:0030057~desmosome,GO:1990124~messenger ribonucleoprotein complex,	GO:0005521~lamin binding,GO:0045296~cadherin binding,	KW-0130~Cell adhesion,
A0A287A481	plasminogen(PLG)	GO:0007596~blood coagulation,GO:0042246~tissue regeneration,GO:0042730~fibrinolysis,GO:0045445~myoblast differentiation,GO:0046716~muscle cell cellular homeostasis,GO:0048771~tissue remodeling,GO:0060707~trophoblast giant cell differentiation,GO:0060716~labyrinthine layer blood vessel development,GO:0071674~mononuclear cell migration,	GO:0005576~extracellular region,GO:0019897~extrinsic component of plasma membrane,GO:0098685~Schaffer collateral - CA1 synapse,GO:0098978~glutamatergic synapse,	GO:0004252~serine-type endopeptidase activity,GO:0019900~kinase binding,	KW-0094~Blood coagulation,KW-0280~Fibrinolysis,KW-0356~Hemostasis,KW-0797~Tissue remodeling,	KW-0964~Secreted,	KW-0378~Hydrolase,KW-0645~Protease,KW-0720~Serine protease,
A0A287A1B4	pregnancy zone protein(PZP)		GO:0005615~extracellular space,	GO:0002020~protease binding,GO:0004866~endopeptidase inhibitor activity,GO:0004867~serine-type endopeptidase inhibitor activity,		KW-0964~Secreted,	KW-0646~Protease inhibitor,KW-0722~Serine protease inhibitor,
A0A286ZY82	proteasome activator subunit 4(PSME4)	GO:0006281~DNA repair,GO:0010499~proteasomal ubiquitin-independent protein catabolic process,GO:0035093~spermatogenesis, exchange of chromosomal proteins,	GO:0005634~nucleus,GO:0005654~nucleoplasm,GO:0005829~cytosol,GO:1990111~spermatoproteasome complex,	GO:0016504~peptidase activator activity,GO:0070577~lysine-acetylated histone binding,GO:0070628~proteasome binding,	KW-0227~DNA damage,KW-0234~DNA repair,	KW-0647~Proteasome,
A0A287A3Z4	retinol binding protein 4(RBP4)	GO:0001654~eye development,GO:0006094~gluconeogenesis,GO:0030277~maintenance of gastrointestinal epithelium,GO:0032024~positive regulation of insulin secretion,GO:0032526~response to retinoic acid,GO:0034633~retinol transport,GO:0042572~retinol metabolic process,GO:0042593~glucose homeostasis,	GO:0005576~extracellular region,GO:0005615~extracellular space,	GO:0016918~retinal binding,GO:0019841~retinol binding,GO:0034632~retinol transporter activity,	KW-0813~Transport,	KW-0964~Secreted,
A0A287AZA7	ribosomal protein S27a(RPS27A)	GO:0006412~translation,GO:0016567~protein ubiquitination,GO:0019941~modification-dependent protein catabolic process,	GO:0005634~nucleus,GO:0005737~cytoplasm,GO:0005840~ribosome,GO:0022627~cytosolic small ribosomal subunit,	GO:0003735~structural constituent of ribosome,GO:0031386~protein tag,GO:0031625~ubiquitin protein ligase binding,GO:0046872~metal ion binding,			KW-0687~Ribonucleoprotein,KW-0689~Ribosomal protein,
A0A5G2QRP9	secreted phosphoprotein 1(SPP1)	GO:0001503~ossification,GO:0001649~osteoblast differentiation,GO:0006710~androgen catabolic process,GO:0007155~cell adhesion,GO:0007165~signal transduction,GO:0031214~biomineral tissue development,GO:0033280~response to vitamin D,GO:0045780~positive regulation of bone resorption,GO:0045893~positive regulation of transcription, DNA-templated,GO:0071394~cellular response to testosterone stimulus,GO…	GO:0005576~extracellular region,GO:0005615~extracellular space,GO:0005794~Golgi apparatus,	GO:0005125~cytokine activity,GO:0005178~integrin binding,GO:0050840~extracellular matrix binding,	KW-0091~Biomineralization,KW-0130~Cell adhesion,	KW-0964~Secreted,	KW-0202~Cytokine,
P20112	secreted protein acidic and cysteine rich(SPARC)	GO:0001937~negative regulation of endothelial cell proliferation,GO:0010595~positive regulation of endothelial cell migration,GO:0016525~negative regulation of angiogenesis,GO:0022604~regulation of cell morphogenesis,GO:0048856~anatomical structure development,	GO:0005604~basement membrane,GO:0005615~extracellular space,GO:0009986~cell surface,GO:0016020~membrane,GO:0016363~nuclear matrix,GO:0031092~platelet alpha granule membrane,	GO:0005509~calcium ion binding,GO:0005518~collagen binding,GO:0050840~extracellular matrix binding,		KW-0084~Basement membrane,KW-0272~Extracellular matrix,KW-0964~Secreted,
F1SCF0	serpin family A member 1(SERPINA1)	GO:0010951~negative regulation of endopeptidase activity,	GO:0005615~extracellular space,GO:0005783~endoplasmic reticulum,GO:0005794~Golgi apparatus,	GO:0002020~protease binding,GO:0004867~serine-type endopeptidase inhibitor activity,GO:0042802~identical protein binding,		KW-0964~Secreted,	KW-0646~Protease inhibitor,KW-0722~Serine protease inhibitor,
A0A286ZX29	serpin family B member 12(SERPINB12)	GO:0002244~hematopoietic progenitor cell differentiation,GO:0010951~negative regulation of endopeptidase activity,	GO:0005615~extracellular space,	GO:0004867~serine-type endopeptidase inhibitor activity,		KW-0964~Secreted,
A0A5G2QUE0	serpin family C member 1(SERPINC1)	GO:0007596~blood coagulation,GO:0010951~negative regulation of endopeptidase activity,GO:2000266~regulation of blood coagulation, intrinsic pathway,	GO:0005615~extracellular space,	GO:0002020~protease binding,GO:0004867~serine-type endopeptidase inhibitor activity,GO:0008201~heparin binding,GO:0042802~identical protein binding,	KW-0094~Blood coagulation,KW-0356~Hemostasis,	KW-0964~Secreted,	KW-0358~Heparin-binding,
A0A287AD21	small ubiquitin like modifier 3(SUMO3)	GO:0016925~protein sumoylation,GO:0043392~negative regulation of DNA binding,GO:1900180~regulation of protein localization to nucleus,	GO:0005634~nucleus,GO:0016605~PML body,	GO:0031386~protein tag,GO:0044389~ubiquitin-like protein ligase binding,	KW-0833~Ubl conjugation pathway,	KW-0539~Nucleus,
A0A287AGI4	structural maintenance of chromosomes 2(SMC2)	GO:0007049~cell cycle,GO:0007076~mitotic chromosome condensation,GO:0010032~meiotic chromosome condensation,GO:0030261~chromosome condensation,GO:0045132~meiotic chromosome segregation,GO:0051276~chromosome organization,GO:0051383~kinetochore organization,	GO:0000228~nuclear chromosome,GO:0000793~condensed chromosome,GO:0000796~condensin complex,GO:0005634~nucleus,GO:0005654~nucleoplasm,GO:0005694~chromosome,GO:0005730~nucleolus,GO:0005737~cytoplasm,	GO:0003682~chromatin binding,GO:0003697~single-stranded DNA binding,GO:0005524~ATP binding,	KW-0131~Cell cycle,KW-0226~DNA condensation,	KW-0158~Chromosome,KW-0539~Nucleus,
A0A2C9F3F0	superoxide dismutase 1(SOD1)	GO:0000187~activation of MAPK activity,GO:0000303~response to superoxide,GO:0001541~ovarian follicle development,GO:0001819~positive regulation of cytokine production,GO:0001895~retina homeostasis,GO:0002262~myeloid cell homeostasis,GO:0006749~glutathione metabolic process,GO:0006801~superoxide metabolic process,GO:0006879~cellular iron ion homeostasis,GO:0007283~spermatogenesis,GO:0007566~embryo…	GO:0005615~extracellular space,GO:0005634~nucleus,GO:0005654~nucleoplasm,GO:0005737~cytoplasm,GO:0005739~mitochondrion,GO:0005777~peroxisome,GO:0005829~cytosol,GO:0005886~plasma membrane,GO:0031410~cytoplasmic vesicle,GO:0032839~dendrite cytoplasm,GO:0032991~macromolecular complex,GO:0043025~neuronal cell body,GO:1904115~axon cytoplasm,	GO:0004784~superoxide dismutase activity,GO:0005507~copper ion binding,GO:0008270~zinc ion binding,GO:0030346~protein phosphatase 2B binding,GO:0031267~small GTPase binding,GO:0042802~identical protein binding,GO:0046872~metal ion binding,GO:0051087~chaperone binding,		KW-0539~Nucleus,KW-0963~Cytoplasm,	KW-0049~Antioxidant,KW-0560~Oxidoreductase,
A0A287B0S3	syndecan 1(SDC1)	GO:0016477~cell migration,GO:0042060~wound healing,GO:0048627~myoblast development,GO:0055002~striated muscle cell development,GO:0060070~canonical Wnt signaling pathway,GO:1903543~positive regulation of exosomal secretion,GO:1903553~positive regulation of extracellular exosome assembly,	GO:0005576~extracellular region,GO:0009897~external side of plasma membrane,GO:0009986~cell surface,GO:0016021~integral component of membrane,	GO:0008022~protein C-terminus binding,GO:0042802~identical protein binding,		KW-0472~Membrane,KW-0964~Secreted,
A0A5S6HZW1	syndecan 4(SDC4)	GO:0016477~cell migration,	GO:0005576~extracellular region,GO:0009986~cell surface,GO:0016021~integral component of membrane,			KW-0472~Membrane,KW-0964~Secreted,
A0A5G2QTF5	thioredoxin(TXN)	GO:0006662~glycerol ether metabolic process,GO:0009314~response to radiation,GO:0043388~positive regulation of DNA binding,	GO:0005576~extracellular region,GO:0005634~nucleus,GO:0005737~cytoplasm,	GO:0015035~protein disulfide oxidoreductase activity,	KW-0249~Electron transport,KW-0804~Transcription,KW-0805~Transcription regulation,KW-0813~Transport,	KW-0539~Nucleus,KW-0963~Cytoplasm,KW-0964~Secreted,	KW-0010~Activator,
A0A288CFV5	transferrin(TF)	GO:0006826~iron ion transport,GO:0006879~cellular iron ion homeostasis,GO:0007015~actin filament organization,GO:0009617~response to bacterium,GO:0019731~antibacterial humoral response,GO:0030316~osteoclast differentiation,GO:0034756~regulation of iron ion transport,GO:0042327~positive regulation of phosphorylation,GO:0045780~positive regulation of bone resorption,GO:0045893~positive regulation o…	GO:0005615~extracellular space,GO:0005769~early endosome,GO:0005770~late endosome,GO:0005886~plasma membrane,GO:0005905~clathrin-coated pit,GO:0009925~basal plasma membrane,GO:0016324~apical plasma membrane,GO:0030139~endocytic vesicle,GO:0031232~extrinsic component of external side of plasma membrane,GO:0048471~perinuclear region of cytoplasm,GO:0055037~recycling endosome,GO:1990712~HFE-transfer…	GO:0004857~enzyme inhibitor activity,GO:0008198~ferrous iron binding,GO:0008199~ferric iron binding,GO:0034986~iron chaperone activity,GO:1990459~transferrin receptor binding,	KW-0406~Ion transport,KW-0410~Iron transport,KW-0813~Transport,	KW-0964~Secreted,
A0A5G2QIE9	transthyretin(TTR)	GO:0006144~purine nucleobase metabolic process,GO:0042572~retinol metabolic process,GO:0070327~thyroid hormone transport,	GO:0005576~extracellular region,GO:0005615~extracellular space,GO:0016021~integral component of membrane,	GO:0005179~hormone activity,GO:0036094~small molecule binding,GO:0070324~thyroid hormone binding,	KW-0813~Transport,	KW-0472~Membrane,KW-0964~Secreted,	KW-0372~Hormone,KW-0795~Thyroid hormone,
A0A288CFT0	triosephosphate isomerase 1(TPI1)	GO:0006094~gluconeogenesis,GO:0006096~glycolytic process,GO:0019242~methylglyoxal biosynthetic process,GO:0019563~glycerol catabolic process,GO:0046166~glyceraldehyde-3-phosphate biosynthetic process,	GO:0005829~cytosol,	GO:0004807~triose-phosphate isomerase activity,GO:0008929~methylglyoxal synthase activity,GO:0031625~ubiquitin protein ligase binding,GO:0042803~protein homodimerization activity,	KW-0312~Gluconeogenesis,KW-0324~Glycolysis,	KW-0963~Cytoplasm,	KW-0413~Isomerase,KW-0456~Lyase,
A0A287B5W2	trypsinogen(LOC100302368)	GO:0006508~proteolysis,	GO:0005615~extracellular space,	GO:0004252~serine-type endopeptidase activity,			KW-0378~Hydrolase,KW-0645~Protease,KW-0720~Serine protease,
F1S2G3	tubulin folding cofactor A(TBCA)	GO:0006457~protein folding,GO:0007021~tubulin complex assembly,GO:0007023~post-chaperonin tubulin folding pathway,	GO:0005730~nucleolus,GO:0005737~cytoplasm,GO:0005829~cytosol,GO:0005874~microtubule,GO:0015630~microtubule cytoskeleton,	GO:0015631~tubulin binding,GO:0048487~beta-tubulin binding,		KW-0206~Cytoskeleton,KW-0493~Microtubule,KW-0963~Cytoplasm,	KW-0143~Chaperone,
A0A287BPX7	tyrosine 3-monooxygenase/tryptophan 5-monooxygenase activation protein beta(YWHAB)	GO:0006605~protein targeting,GO:0035308~negative regulation of protein dephosphorylation,GO:0043085~positive regulation of catalytic activity,GO:0045744~negative regulation of G-protein coupled receptor protein signaling pathway,GO:0051220~cytoplasmic sequestering of protein,	GO:0005829~cytosol,GO:0048471~perinuclear region of cytoplasm,	GO:0004860~protein kinase inhibitor activity,GO:0019904~protein domain specific binding,GO:0042802~identical protein binding,GO:0042826~histone deacetylase binding,GO:0050815~phosphoserine binding,
F2Z4Z1	tyrosine 3-monooxygenase/tryptophan 5-monooxygenase activation protein gamma(YWHAG)		GO:0016020~membrane,	GO:0005044~scavenger receptor activity,
A0A287A0Q6	tyrosine 3-monooxygenase/tryptophan 5-monooxygenase activation protein zeta(YWHAZ)	GO:0001525~angiogenesis,GO:0003016~respiratory system process,GO:0006468~protein phosphorylation,GO:0006605~protein targeting,GO:0008039~synaptic target recognition,GO:0010941~regulation of cell death,GO:0030324~lung development,GO:0035148~tube formation,GO:0051683~establishment of Golgi localization,GO:0070371~ERK1 and ERK2 cascade,GO:0070372~regulation of ERK1 and ERK2 cascade,GO:0090128~regula…	GO:0005634~nucleus,GO:0098686~hippocampal mossy fiber to CA3 synapse,GO:0098978~glutamatergic synapse,	GO:0004497~monooxygenase activity,GO:0019901~protein kinase binding,GO:0019904~protein domain specific binding,GO:0031625~ubiquitin protein ligase binding,GO:0042802~identical protein binding,GO:0044325~ion channel binding,			KW-0503~Monooxygenase,KW-0560~Oxidoreductase,
A0A287AU21	zinc finger C3H1-type containing(ZFC3H1)	GO:0006396~RNA processing,	GO:0000178~exosome (RNase complex),GO:0005634~nucleus,
F1RPC0	zona pellucida glycoprotein 2(ZP2)	GO:0007339~binding of sperm to zona pellucida,GO:0060468~prevention of polyspermy,	GO:0005576~extracellular region,GO:0005771~multivesicular body,GO:0005783~endoplasmic reticulum,GO:0005886~plasma membrane,GO:0016021~integral component of membrane,GO:0035805~egg coat,	GO:0032190~acrosin binding,GO:0035804~structural constituent of egg coat,GO:0042802~identical protein binding,	KW-0278~Fertilization,	KW-0272~Extracellular matrix,KW-0472~Membrane,KW-0964~Secreted,KW-1003~Cell membrane,	KW-0675~Receptor,
F1RKE0	zona pellucida glycoprotein 3(ZP3)	GO:0001809~positive regulation of type IV hypersensitivity,GO:0001825~blastocyst formation,GO:0002455~humoral immune response mediated by circulating immunoglobulin,GO:0002687~positive regulation of leukocyte migration,GO:0002922~positive regulation of humoral immune response,GO:0007165~signal transduction,GO:0007339~binding of sperm to zona pellucida,GO:0010469~regulation of receptor activity,GO…	GO:0005576~extracellular region,GO:0005615~extracellular space,GO:0005886~plasma membrane,GO:0016021~integral component of membrane,GO:0031012~extracellular matrix,GO:0035805~egg coat,	GO:0030246~carbohydrate binding,GO:0032190~acrosin binding,GO:0035804~structural constituent of egg coat,GO:0048018~receptor agonist activity,	KW-0278~Fertilization,	KW-0272~Extracellular matrix,KW-0472~Membrane,KW-0964~Secreted,KW-1003~Cell membrane,	KW-0675~Receptor,
Q07287	zona pellucida glycoprotein 4(ZP4)	GO:0002922~positive regulation of humoral immune response,GO:0042102~positive regulation of T cell proliferation,GO:0060478~acrosomal vesicle exocytosis,GO:2000344~positive regulation of acrosome reaction,GO:2000360~negative regulation of binding of sperm to zona pellucida,	GO:0005576~extracellular region,GO:0005886~plasma membrane,GO:0016021~integral component of membrane,GO:0035805~egg coat,	GO:0032190~acrosin binding,GO:0035804~structural constituent of egg coat,GO:0042802~identical protein binding,	KW-0278~Fertilization,	KW-0272~Extracellular matrix,KW-0472~Membrane,KW-0964~Secreted,KW-1003~Cell membrane,	KW-0675~Receptor,
