# Supplementary material for: ROCK Inhibitor (Y-27632) Abolishes the Negative Impacts of miR-155 in the Endometrium-Derived Extracellular Vesicles and Supports Embryo Attachment
Source: Cells. 2022 Oct 10;11(19):3178. doi: 10.3390/cells11193178 (PMC9564368; doi:10.3390/cells11193178)
Supplement: Supplementary file 1 [file cells-11-03178-s001.zip › Table S3. Biological processes.xlsx]

## Sheet: Biological process cell adhesio
ID	Gene Name
Biological Process-Cell adhesion
A0A5G2QN76	CD44 molecule(CD44)
A0A287BPL8	cadherin 1(CDH1)
I3LA65	desmoglein 1(DSG1)
A0A2C9F3E9	junction plakoglobin(JUP)
I3LGN8	plakophilin 1(PKP1)
A0A5G2QRP9	secreted phosphoprotein 1(SPP1)
Hydrolases & Apoptosis
F1RZ89	N-sulfoglucosamine sulfohydrolase(SGSH)
A0A287BF94	cathepsin B(CTSB)
Q28944	cathepsin V(CTSV)
F1S6M1	galactosamine (N-acetyl)-6-sulfatase(GALNS)
A0A286ZUW1	glucosamine (N-acetyl)-6-sulfatase(GNS)
A0A2C9F3C0	glucuronidase beta(GUSB)
A0A5G2QA84	leucine aminopeptidase 3(LAP3)
F1SUQ9	peptidyl arginine deiminase 6(PADI6)
A0A287A481	plasminogen(PLG)
A0A287B5W2	trypsinogen(LOC100302368)
Antioxidants
A0A287A690	peroxiredoxin 2(PRDX2)
A0A2C9F3F0	superoxide dismutase 1(SOD1)
Positive regulation of receptor-mediated endocytosis
A0A287B7B9	beta-2-microglobulin(B2M)
A0A287B7B9	beta-2-microglobulin(B2M)
A0A5G2QJA9	complement C3(C3)
A0A288CFV5	transferrin(TF)
Extracellular matrix
A0A286ZJV6	annexin A2(ANXA2)
P20112	secreted protein acidic and cysteine rich(SPARC)
F1RPC0	zona pellucida glycoprotein 2(ZP2)
F1RKE0	zona pellucida glycoprotein 3(ZP3)
Q07287	zona pellucida glycoprotein 4(ZP4)
Secreted proteins
A0A287AHK1	GC vitamin D binding protein(GC)
A0A287A363	afamin(AFM)
A0A286ZT13	albumin(ALB)
A0A5G2QUE9	alpha fetoprotein(AFP)
A0A5G2Q8I9	alpha-2-macroglobulin(A2M)
A0A286ZJV6	annexin A2(ANXA2)
K7GM40	apolipoprotein A1(APOA1)
A0A287B7B9	beta-2-microglobulin(B2M)
A0A287B7B9	beta-2-microglobulin(B2M)
A0A287BF94	cathepsin B(CTSB)
Q28944	cathepsin V(CTSV)
A0A5G2QJA9	complement C3(C3)
A0A287A481	plasminogen(PLG)
A0A287A1B4	pregnancy zone protein(PZP)
A0A287A3Z4	retinol binding protein 4(RBP4)
A0A5G2QRP9	secreted phosphoprotein 1(SPP1)
P20112	secreted protein acidic and cysteine rich(SPARC)
F1SCF0	serpin family A member 1(SERPINA1)
A0A286ZX29	serpin family B member 12(SERPINB12)
A0A5G2QUE0	serpin family C member 1(SERPINC1)
A0A287B0S3	syndecan 1(SDC1)
A0A5S6HZW1	syndecan 4(SDC4)
A0A5G2QTF5	thioredoxin(TXN)
A0A288CFV5	transferrin(TF)
A0A5G2QIE9	transthyretin(TTR)
F1RPC0	zona pellucida glycoprotein 2(ZP2)
F1RKE0	zona pellucida glycoprotein 3(ZP3)
Q07287	zona pellucida glycoprotein 4(ZP4)
