# Supplementary figures and images for: ROCK Inhibitor (Y-27632) Abolishes the Negative Impacts of miR-155 in the Endometrium-Derived Extracellular Vesicles and Supports Embryo Attachment
Source: MDPI journal article supplement (doi:10.3390/cells11193178), 2022-10-10

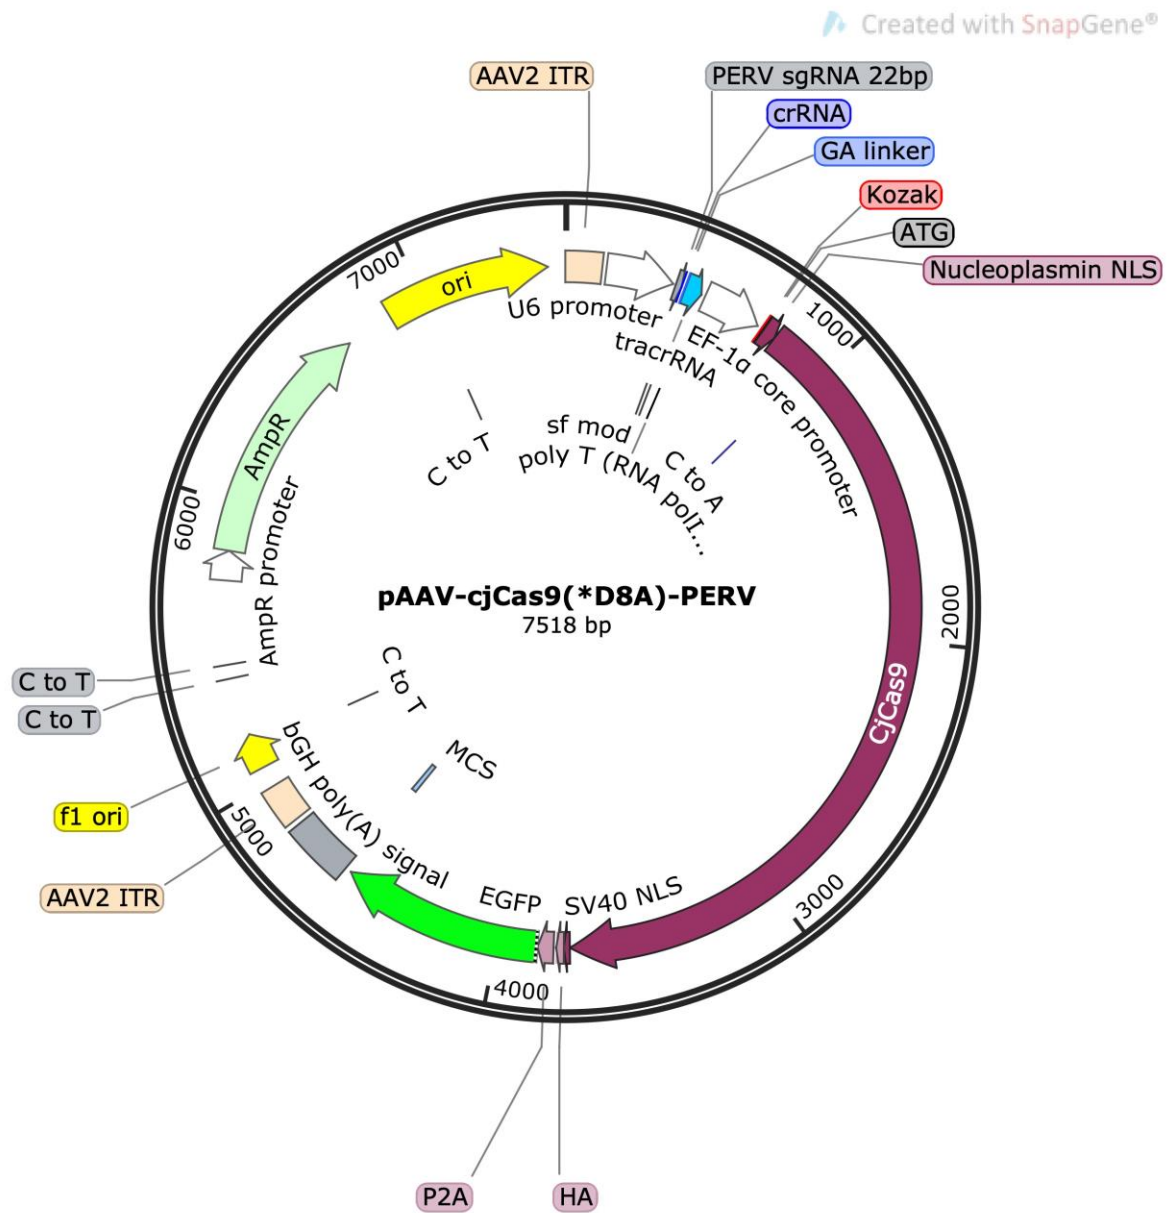

**Figure S1.** The vector used for depletion of PERV through Crispr/Cas9.

Supplement: s1 [file s1]
